# Supplementary material for: Nesting behaviour influences species-specific gas exchange across avian eggshells
Source: PubMed Central journal article supplement (PMC4179895; doi:10.1242/jeb.103291), 2014-09-15
Supplement: supp_217.18.3326_JEB103291.pdf [file supp_217.18.3326_JEB103291.pdf]

**Table S1.** Full table of conductance measurements and life history traits for all species measured[Download Table S1](#)**Table S2.** Breakdown of conductance values for each egg region: B (blunt end), E (equator) and P (pointed end)[Download Table S2](#)

Table S3. The relative contribution of the non-significant variables included in the initial full model, and which were subsequently removed

A: Species mean (water vapour conductance,  $G_{H_2O}$  mg day<sup>-1</sup> Torr<sup>-1</sup>)

| Source         | Df  | SSQ     | MS      | F    | P      |
|----------------|-----|---------|---------|------|--------|
| Thickness      | 1   | 0.00049 | 0.00049 | 4.73 | 0.03   |
| Nest           | 5   | 0.00268 | 0.00067 | 6.47 | >0.001 |
| Wet Parent     | 1   | 0.00046 | 0.00046 | 4.47 | 0.04   |
| Cavity         | 1   | 0.00001 | 0.00001 | 0.13 | 0.72   |
| Development    | 1   | 0.00000 | 0.00000 | 0.01 | 0.91   |
| Calcium Diet   | 2   | 0.00045 | 0.00023 | 2.18 | 0.12   |
| Migration      | 2   | 0.00040 | 0.00020 | 1.92 | 0.15   |
| Incubation     | 1   | 0.00002 | 0.00002 | 0.22 | 0.64   |
| Clutch Size    | 1   | 0.00003 | 0.00003 | 0.29 | 0.59   |
| Egg Patterning | 1   | 0.00004 | 0.00004 | 0.37 | 0.54   |
| Error          | 122 | 0.01264 | 0.00010 |      |        |

B: Blunt (water vapour conductance,  $G_{H_2O}$  mg day<sup>-1</sup> Torr<sup>-1</sup>)

| Source         | Df  | SSQ     | MS      | F     | P      |
|----------------|-----|---------|---------|-------|--------|
| Thickness      | 1   | 0.00021 | 0.00021 | 1.72  | 0.19   |
| Nest           | 5   | 0.00243 | 0.00061 | 4.91  | >0.001 |
| Wet Parent     | 1   | 0.00175 | 0.0175  | 14.21 | >0.001 |
| Cavity         | 1   | 0.00001 | 0.00001 | 0.05  | 0.82   |
| Development    | 1   | 0.00009 | 0.00009 | 0.73  | 0.39   |
| Calcium Diet   | 2   | 0.00095 | 0.00048 | 3.85  | 0.02   |
| Migration      | 2   | 0.00042 | 0.00021 | 1.72  | 0.18   |
| Incubation     | 1   | 0.00008 | 0.00008 | 0.62  | 0.43   |
| Clutch Size    | 1   | 0.00003 | 0.00003 | 0.24  | 0.62   |
| Egg Patterning | 1   | 0.00009 | 0.00009 | 0.75  | 0.39   |
| Error          | 122 | 0.00012 |         |       |        |
